# Supplementary material for: Synthesis and optical properties of CsCu2Br3–Cu0 nanoheterojunctions
Source: Royal Society of Chemistry journal article supplement (doi:10.1039/d2tc03214g), 2022-01-01
Supplement: d2tc03214g1.pdf [file d2tc03214g1.pdf]

*Supporting information for*

## Synthesis and Optical Properties of CsCu<sub>2</sub>Br<sub>3</sub>-Cu<sup>0</sup> Nanoheterojunctions

*Qifei Ying<sup>†</sup>, Tingwei Hua<sup>†</sup>, Yilin Wang<sup>†</sup>, Xiangdong Liu<sup>†</sup>, Yang Wei<sup>†</sup>, Hongbo Li<sup>†\*</sup>,*

*Ling Huang<sup>†‡\*</sup>*

<sup>†</sup>Institute of Advanced Materials, Nanjing Tech University, Nanjing 211816, China

<sup>‡</sup>State Key Laboratory of Chemistry and Utilization of Carbon Based Energy Materials,

College of Chemistry, Xinjiang University, Urumqi, Xinjiang, 830046, China

\*E-mail: iamhbli@njtech.edu.cn; iamlhuang@njtech.edu.cn

Keywords: CsCu<sub>2</sub>Br<sub>3</sub>-Cu<sup>0</sup>, heterojunction, localized surface plasmon resonance, lattice distortion, narrow-band dual emission

## Experimental section

### Materials

Cs<sub>2</sub>CO<sub>3</sub> (99.9% Aldrich), octadecene (ODE, 90%, Aldrich), oleic acid (OA, 90%, Aldrich), oleylamine (OM, 70%, Aldrich), PbBr<sub>2</sub> (99.999%, Aldrich), CuBr<sub>2</sub> (98.5%, Aldrich), cyclohexane (99.7%, Aldrich), anhydrous ethanol (99.7%, Aldrich).

All chemicals were used as received without further purification.

**Preparation of Cs-oleate solution:** 0.2035 g (0.62 mmol) Cs<sub>2</sub>CO<sub>3</sub> was loaded into a 50 mL three-necked bottle, along with 10 mL ODE, 1.5 mL OA were put into a pre-cleaned and dried under the protection of N<sub>2</sub>, and then heated at 120 °C until all Cs<sub>2</sub>CO<sub>3</sub> were dissolved.

**Preparation of CsCu<sub>2</sub>Br<sub>3</sub>-Cu<sup>0</sup> heterojunction NRs:** 0.0587 g (0.16 mmol) PbBr<sub>2</sub>, 0.1787 g (0.49 mmol) CuBr<sub>2</sub>, 5 mL ODE, 0.7 mL OA, 0.7 mL OM were put into a pre-cleaned and dried three-necked bottle, heated at 120 °C under vacuum and stirred for 15 minutes, and then heated to 200 °C under N<sub>2</sub> protection, kept stirring until the color of the solution in the three-necked flask turned dark brown. After continued stirring for 5 minutes, 1 mL Cs-OA solution was injected, and cooled to room temperature in an ice-water about 5 s. The reaction solution is first washed by ODE centrifugation, the upper solution is poured out, the lower precipitation is purified by cyclohexane centrifugation, and the upper solution is stored in a glass bottle.

**Preparation of CsCu<sub>2</sub>Br<sub>3</sub> NCs:** In the experiment of preparing CsCu<sub>2</sub>Br<sub>3</sub>, without adding PbBr<sub>2</sub>, and other conditions remain unchanged, CsCu<sub>2</sub>Br<sub>3</sub> nanocrystals are obtained.

## Characterization

Transmission electron microscopy (TEM) and high-resolution TEM investigations were carried out on a JEM 2100F. The X-ray diffraction (XRD) measurements were performed on a Rigaku Ultima X-ray IV diffractometer using a Cu K $\alpha$  source at 3 deg·min<sup>-1</sup>. Time-resolved photoluminescence (PL) measurements were performed using a time-correlated single photon counting setup (TCSPC) utilizing SPC-130-EM counting module and BDL-488-SMN pico-second laser. Horiba Jobin Yvon iHR 320 spectrometer equipped with a Synapse CCD was used to acquire luminescence spectra. X-ray photoelectron spectroscopy (XPS) measurements were performed using a Kratos AXIS Ultra. Auger electron spectroscopy (AES) measurements were performed using a ESCALAB 250XI-AES.

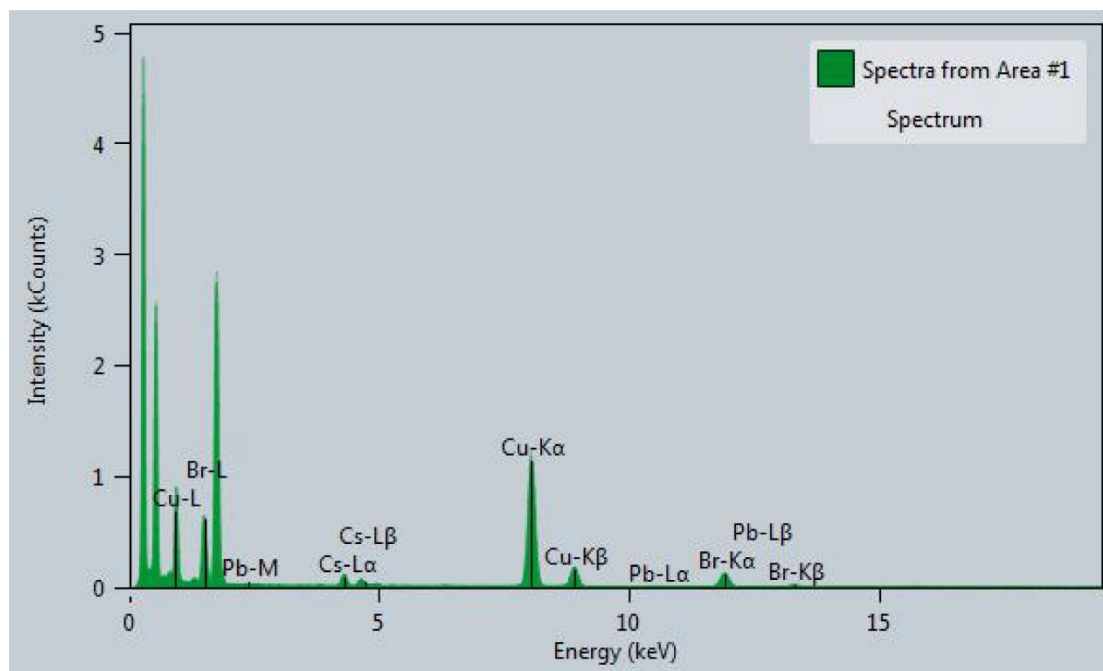

**Figure S1.** EDX spectrum of the CsCu<sub>2</sub>Br-Cu<sup>0</sup> heterojunction NRs.

**Table S1.** Results of semi-quantitative analysis of composite elements of CsCu<sub>2</sub>Br<sub>3</sub>-Cu<sup>0</sup> heterojunction NRs.

| Z  | Element | Family | Atomic Fraction | Atomic Error | Mass Fraction | Mass Error | Fit Error |
|----|---------|--------|-----------------|--------------|---------------|------------|-----------|
| 29 | Cu      | K      | 81.29%          | 9.10%        | 74.68%        | 6.14%      | 0.10%     |
| 35 | Br      | K      | 14.15%          | 2.24%        | 16.35%        | 2.28%      | 0.26%     |
| 55 | Cs      | L      | 4.34%           | 0.62%        | 8.33%         | 1.01%      | 0.29%     |
| 82 | Pb      | L      | 0.21%           | 0.03%        | 0.64%         | 0.08%      | 4.42%     |

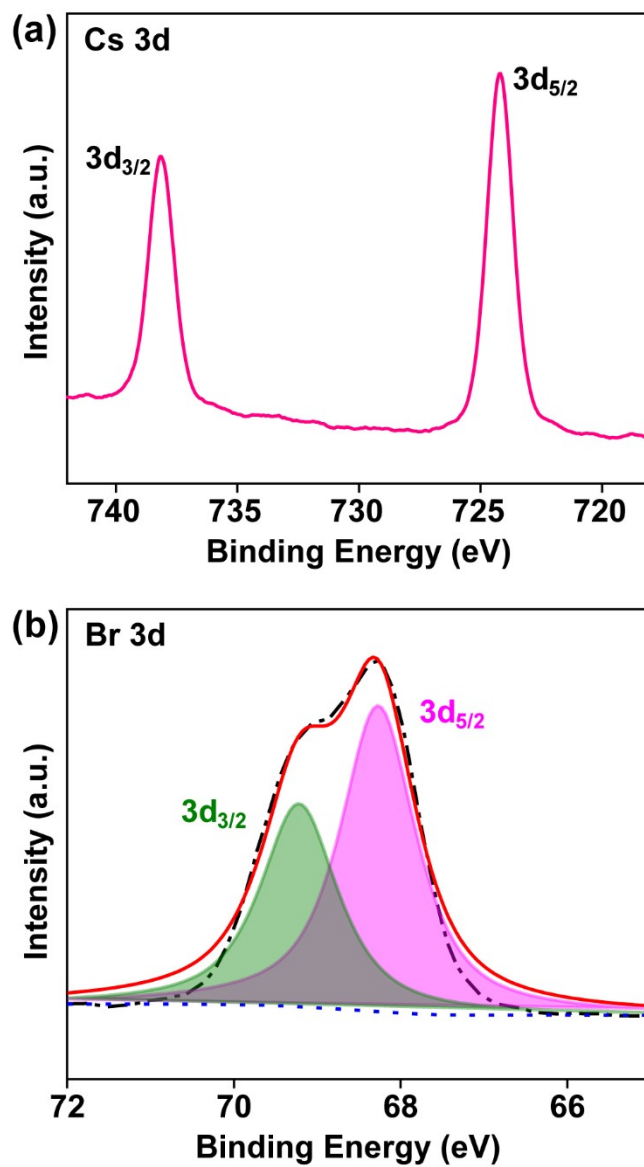

Figure S2. XPS spectra (a) Cs, (b) Br elements of  $\text{CsCu}_2\text{Br}_3\text{-Cu}^0$  heterojunction NRs

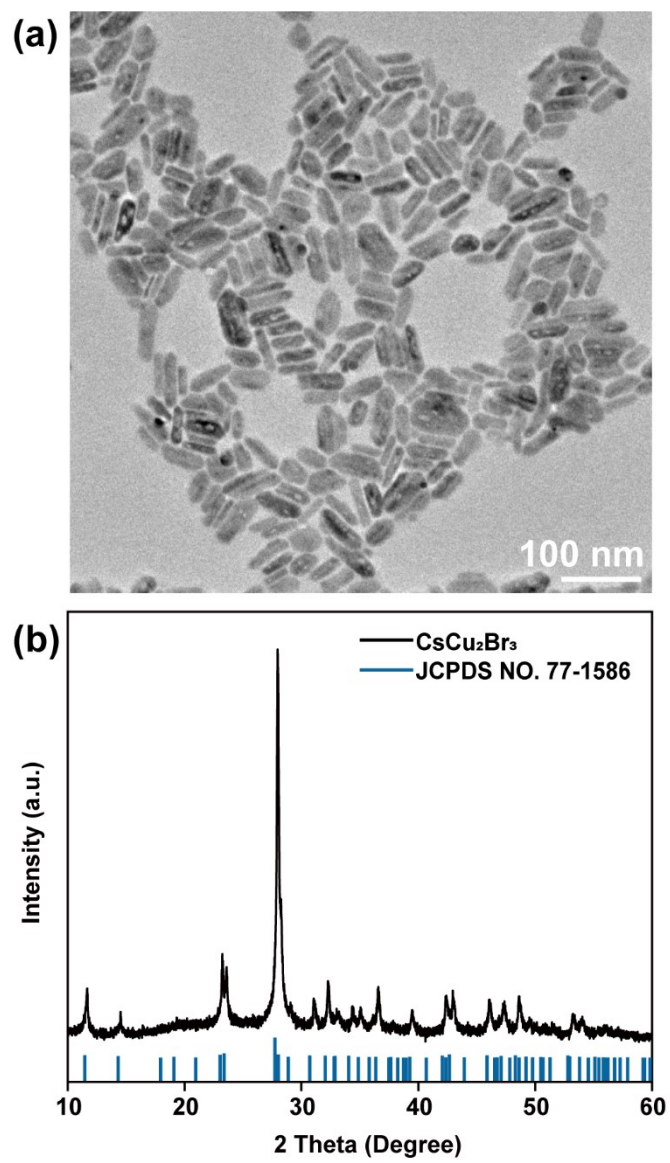

**Figure S3.** (a) TEM image of CsCu<sub>2</sub>Br<sub>3</sub>. (b) XRD pattern of CsCu<sub>2</sub>Br<sub>3</sub>.

**Table S2.** PL decay parameters of CsCu<sub>2</sub>Br<sub>3</sub>-Cu<sup>0</sup> heterojunction NRs and CsCu<sub>2</sub>Br<sub>3</sub> NCs.

| <b>Sample</b>                                      | <b>Wavelength</b> | <b><math>\tau_1</math> (ns)</b> | <b>A<sub>1</sub></b> | <b><math>\tau_2</math> (ns)</b> | <b>A<sub>2</sub></b> | <b><math>\tau</math> (ns)</b> |
|----------------------------------------------------|-------------------|---------------------------------|----------------------|---------------------------------|----------------------|-------------------------------|
|                                                    | <b>h (nm)</b>     |                                 |                      |                                 |                      |                               |
| CsCu <sub>2</sub> Br <sub>3</sub> -Cu <sup>0</sup> | 436               | 0.7588                          | 1945.6686            | 3.7844                          | 288.0584             | 2.0                           |
| CsCu <sub>2</sub> Br <sub>3</sub> -Cu <sup>0</sup> | 460               | 1.1947                          | 1754.5323            | 4.9225                          | 350.1296             | 2.9                           |
| CsCu <sub>2</sub> Br <sub>3</sub>                  | 500               | 2.2684                          | 71112.155            | 15.3043                         | 429.1701             | 2.8                           |



**Table S3.** Lattice parameters of CsCu<sub>2</sub>Br<sub>3</sub> in the CsCu<sub>2</sub>Br<sub>3</sub>-Cu<sup>0</sup> heterojunction NRs

| Space Group: Cmc <sub>2</sub> m (#63-1) |                        |          |          |
|-----------------------------------------|------------------------|----------|----------|
| a                                       | 9.8585 Å               | $\alpha$ | 90.0000° |
| b                                       | 12.3479 Å              | $\beta$  | 90.0000° |
| c                                       | 5.7771 Å               | $\gamma$ | 90.0000° |
| Cu-Cu(a)                                | 3.121 Å                | Cu-Br1   | 2.390 Å  |
| Cu-Cu(c)                                | 2.888 Å                | Cu-Br2   | 2.611 Å  |
| V                                       | 703.256 Å <sup>3</sup> |          |          |
